# Supplementary material for: Burrowing star-nosed moles (Condylura cristata) are not hypoxia tolerant
Source: Oxford University Press journal article supplement (doi:10.1242/jeb.242972), 2021-09-17
Supplement: jeb242972supp.pdf [file jeb242972supp.pdf]

**Table S1.** Metabolic and ventilatory responses of juvenile vs. adult star-nosed moles to acute hypoxia. Mean  $\pm$  S.E.M. and p-values of Sidak's multiple comparison test between adult and juvenile star-nosed moles, with sample sizes for each presented in parentheses.

[Click here to download Table S1](#)

**Table S2.** Metabolic and ventilatory comparisons of star-nosed moles during normoxia and hypoxia trials. Mean  $\pm$  S.E.M. and p-values of Sidak's multiple comparison test between normoxic and hypoxic protocols for pooled adult and juvenile data, with sample sizes presented in parentheses.

[Click here to download Table S2](#)

**Table S3.** Metabolic and ventilatory timecourse comparisons of star-nosed moles during normoxia and hypoxia trials. Mean  $\pm$  S.E.M. and p-values of Tukey's multiple comparison between time points within the normoxic and hypoxic protocols for pooled adult and juvenile data, with sample sizes presented in parentheses.

[Click here to download Table S3](#)
